# Supplementary material for: Gasotransmitters in the tumor microenvironment: Impacts on cancer chemotherapy
Source: PubMed Central journal article supplement — Mol Med Rep. 2022 May 25;26(1):233. doi: 10.3892/mmr.2022.12749 (PMC9178674; doi:10.3892/mmr.2022.12749), 2022-05-25
Supplement: Supplementary_Data1.pdf [file Supplementary_Data1.pdf]

Table SI. Classification of chemotherapeutic drugs, including their mechanism of action, targets and running clinical trials.

| First author/s, year | Types of drugs    | Names        | Mechanism of action                                                                                                            | Targets                                                                                                                                                                                                 | Running clinical trials                                                                                                                    | (Refs.) |
|----------------------|-------------------|--------------|--------------------------------------------------------------------------------------------------------------------------------|---------------------------------------------------------------------------------------------------------------------------------------------------------------------------------------------------------|--------------------------------------------------------------------------------------------------------------------------------------------|---------|
| Lee, 1995            | Alkylating agents | Altretamine  | Unknown, it is considered to induce DNA damage by producing intermediate compounds, which interact covalently with DNA strand. | Most cancer types, such as ovarian cancer, Kaposi sarcoma, prostate cancer, head and neck cancer, lymphoma, pancreatic cancer, bladder cancer, colorectal cancer, small cell lung carcinoma and others. | 38                                                                                                                                         | (1)     |
| Bendamustine, 2006   |                   | Bendamustine |                                                                                                                                | Most solid and hematopoietic cancers, such as breast, ovarian and lung cancer, Hodgkin and non-Hodgkin lymphomas, multiple myeloma, and others.                                                         | 311                                                                                                                                        | (2)     |
| Dechant KL, 1991     |                   | Ifosfamide   |                                                                                                                                | Testicular and germ cell cancers, breast, pancreatic, lung, kidney, bladder, ovarian, cervical and brain cancer, and unspecific solid cancers.                                                          | 469                                                                                                                                        | (3)     |
| O'Marcai gh, 1996    |                   | Busulfan     |                                                                                                                                | Upon hydrolysis, the produced carbonium ions induce DNA alkylation, which results in adenine-guanine crosslinking. Disturbing DNA replication and RNA transcription processes.                          | Vast majority of hematological cancers, multiple myeloma, brain cancers, sarcoma, breast, liver and renal cancer, and other solid cancers. | 493     |

|                    |  |                  |                                                                                                                                                                                                                                                                                                                                                                                                                       |                                                                                                                                                                                |                                                                                             |      |
|--------------------|--|------------------|-----------------------------------------------------------------------------------------------------------------------------------------------------------------------------------------------------------------------------------------------------------------------------------------------------------------------------------------------------------------------------------------------------------------------|--------------------------------------------------------------------------------------------------------------------------------------------------------------------------------|---------------------------------------------------------------------------------------------|------|
| Fox, 2000          |  | Carboplatin      | <p>In general, they induce DNA damage in three different mechanisms: i) Induce mispairing of DNA nucleotides; ii) induce DNA fragmentation upon alkylation. This action is a consequence of DNA repair mechanisms attempting to replace the alkyl group; and iii) interatomic-crosslinking of DNA strand, thus preventing the separation of the double strand. Overall, preventing DNA synthesis and replication.</p> | Variety of solid cancers, mainly ovarian, breast, lung, endometrial, prostate, head and neck, and cervical cancer.                                                             | 2,645                                                                                       | (5)  |
| Vidal L, 2016      |  | Chlorambucil     |                                                                                                                                                                                                                                                                                                                                                                                                                       | Mainly leukemia and lymphoma, also gastric and bladder cancer.                                                                                                                 | 65                                                                                          | (6)  |
| Dasari S, 2014     |  | Cisplatin        |                                                                                                                                                                                                                                                                                                                                                                                                                       | Majority of solid and epithelial cancers, such as ovarian, breast, gastric, lung, bladder, esophageal, head and neck, gallbladder, cervical and pancreatic cancer, and others. | 3,589                                                                                       | (7)  |
| Emadi A, 2009      |  | Cyclophosphamide |                                                                                                                                                                                                                                                                                                                                                                                                                       | Breast, prostate, ovarian, lung, pancreatic, endometrial, colorectal, and head and neck cancer, and hematopoietic malignancies.                                                | 3,400                                                                                       | (8)  |
| Nichols, 2006      |  | Mechlorethamine  |                                                                                                                                                                                                                                                                                                                                                                                                                       | Advanced solid cancers, prostate, ovarian, brain, breast, colon, esophageal and lung cancer, neuroblastoma, multiple myeloma, and hematological cancer.                        | 232                                                                                         | (9)  |
| Thirumaran R, 2007 |  | Melphalan        |                                                                                                                                                                                                                                                                                                                                                                                                                       | Liver, prostate, pancreatic, colorectal, breast and ovarian cancer, central nervous system cancers, sarcomas, multiple myeloma, leukemia and lymphoma.                         | 813                                                                                         | (10) |
| Koprowska K, 2011  |  | Dacarbazine      |                                                                                                                                                                                                                                                                                                                                                                                                                       | Unknown, it may inhibit DNA synthesis by acting as an analog for purines and/or interacting with SH (thiol) group on DNA strands. It is                                        | Melanoma, sarcomas, neuroendocrine cancers, thyroid and lung cancer, and Hodgkin lymphomas. | 218  |

|               |  |              |                                                                                                                                                                                                                                                                                                                                                                                                                                                                                                                                 |                                                                                                                                                                              |       |      |
|---------------|--|--------------|---------------------------------------------------------------------------------------------------------------------------------------------------------------------------------------------------------------------------------------------------------------------------------------------------------------------------------------------------------------------------------------------------------------------------------------------------------------------------------------------------------------------------------|------------------------------------------------------------------------------------------------------------------------------------------------------------------------------|-------|------|
|               |  |              | also considered to induce DNA alkylation preventing nucleic acid synthesis.                                                                                                                                                                                                                                                                                                                                                                                                                                                     |                                                                                                                                                                              |       |      |
| Riddell, 2018 |  | Oxaliplatin  | Non-enzymatic lysis of oxaliplatin produces diaquo cyclohexanediamine platinum reactive derivatives, which bind to the guanine and cytosine and thus enhance DNA crosslinking. Eventually, inhibiting nucleic acid function.                                                                                                                                                                                                                                                                                                    | Breast, head and neck, colorectal, liver, gastric, esophageal, pancreatic, ovarian, prostate, lung, endometrial and thyroid cancer, cholangiocarcinoma, and B cell lymphoma. | 2,033 | (12) |
| Thomas, 2017  |  | Temozolomide | Activated upon the conversion to 3-methyl-(triazene-1-yl) imidazole-4-carboxamide, which induces DNA alkylation at specific positions of guanine and adenosine. The specific guanine methylation leads to DNA strand breaks and thus induces cell death (apoptosis). It is also suggested that the active derivatives interfere with the DNA mismatch repair system, leading to failure in finding a complementary base for methylated guanine. This induces DNA nicking, which inhibits the replication process and sequesters | Colorectal, breast, ovarian, prostate, lung and gastrointestinal cancer, glioblastoma, astrocytoma and glioma neuroblastoma.                                                 | 928   | (13) |

|                 |                                          |              |                                                                                                                                                                                                                                                                                                                                                    |                                                                                                          |     |      |
|-----------------|------------------------------------------|--------------|----------------------------------------------------------------------------------------------------------------------------------------------------------------------------------------------------------------------------------------------------------------------------------------------------------------------------------------------------|----------------------------------------------------------------------------------------------------------|-----|------|
|                 |                                          |              | the cell at G <sub>2</sub> -M phase, thus blocking the cell cycle.                                                                                                                                                                                                                                                                                 |                                                                                                          |     |      |
| Beilke LD, 2014 |                                          | Thiotepa     | Unspecific drug, it crosslinks the DNA strand at guanine residue upon alkylation. Preventing DNA unwinding and replication, thus inhibiting the cell division process.                                                                                                                                                                             | Brain, ovarian and testicular, breast, and hematologic cancer, and sarcomas.                             | 233 | (14) |
| Carter NJ, 2007 |                                          | Trabectedin  | It may affect the transcription-coupled nucleotide excision repair system by alkylating guanine residues upon the interaction with the DNA minor groove. It inhibits G <sub>2</sub> phase and cell division, as well as the expression of multi-drug resistance gene, which is responsible for developing resistance to treatment in cancer cells. | Sarcomas, prostate, ovarian, breast, pancreatic and peritoneal cancer, and unspecified childhood cancer. | 93  | (15) |
| Pai VB, 2000    | Nitrosoureas alkylating agents sub group | Carmustine   | Induces DNA alkylation that results in adenine-guanine crosslinking. Disturbing DNA replication and RNA transcription processes. It also interferes and modifies glutathione reductase.                                                                                                                                                            | Multiple myeloma, glioblastoma and brain cancers, and Hodgkin and non-Hodgkin lymphomas.                 | 238 | (16) |
| Krug S, 2015    |                                          | Streptozocin | Upon activation produces methyl-carbonium ions, which induces DNA alkylation and crosslinking,                                                                                                                                                                                                                                                     | Pancreatic, neuroendocrine and brain cancers.                                                            | 15  | (17) |

|                  |                 |                         |                                                                                                                                                                                                     |                                                                                                                                                                            |     |      |
|------------------|-----------------|-------------------------|-----------------------------------------------------------------------------------------------------------------------------------------------------------------------------------------------------|----------------------------------------------------------------------------------------------------------------------------------------------------------------------------|-----|------|
|                  |                 |                         | and thus inhibits nucleic acid synthesis. Manipulates different biochemical reactions, such as NAD and NADH, and inhibits essential enzymes for gluconeogenesis.                                    |                                                                                                                                                                            |     |      |
| Nikolova T, 2017 |                 | Lomustine and semustine | Upon hydrolysis, produces reactive metabolites that induce DNA alkylation and crosslinking. Inhibits nucleic acid synthesis and the cell cycle, while it induces cytotoxicity.                      | Glioblastoma and brain cancers, and relapsed Hodgkin lymphoma, melanoma and neuroectodermal cancers.                                                                       | 116 | (18) |
| Lombardi G, 2014 |                 | Fotemustine             | Interferes with actin and tubulin polarization by inhibiting thioredoxin reductase 1.                                                                                                               | Melanoma, relapsed glioma, brain metastasis and central nervous system lymphomas.                                                                                          | 13  | (19) |
| Endo T, 2020     |                 | Nimustine               | Interferes with DNA to induce its fragmentation and inhibits protein synthesis.                                                                                                                     | High grade glioma.                                                                                                                                                         | 1   | (20) |
| Kameoka Y, 2018  |                 | Ranimustine             | Crosslinks DNA strands and inhibits DNA synthesis.                                                                                                                                                  | Leukemia and lymphoma.                                                                                                                                                     | 1   | (21) |
| Kennedy BJ, 1961 |                 | Uracil mustard          | Crosslinks DNA strands and inhibits DNA synthesis.                                                                                                                                                  | Lymphoma.                                                                                                                                                                  | n/a | (22) |
| El Fakih R, 2018 | Antimetabolites | Azacitidine             | At low doses, binds covalently to DNA methyltransferase by inducing hypomethylation and preventing nucleic acid synthesis. At high doses, induces cytotoxicity upon incorporation with RNA and DNA. | Myeloid and lymphoid malignancies. It can be used with solid cancers, such as head and neck, pancreatic, prostate, colorectal, esophageal, and non-small cell lung cancer. | 523 | (23) |

|                  |  |                  |                                                                                                                                                                                                                                                                                                                                                                    |                                                                                                                                                                                                                    |       |      |
|------------------|--|------------------|--------------------------------------------------------------------------------------------------------------------------------------------------------------------------------------------------------------------------------------------------------------------------------------------------------------------------------------------------------------------|--------------------------------------------------------------------------------------------------------------------------------------------------------------------------------------------------------------------|-------|------|
|                  |  |                  | It has higher affinity toward RNA, preventing the assembly of polyribosomes and inhibiting protein synthesis, thus causing cell death.                                                                                                                                                                                                                             |                                                                                                                                                                                                                    |       |      |
| Longley DB, 2003 |  | 5-fluorouracil   | Binds covalently to thymidylate synthase with methylenetetrahydrofolate, thus inhibiting thymidylate synthesis from uracil. It blocks DNA and RNA synthesis and promotes cell death. Additionally, it interacts with uridine triphosphate of RNA, leading to the disfunction of RNA processing and the inhibition of protein synthesis.                            | Esophageal, gastric, colorectal, breast, biliary tract, stomach, colorectal, head and neck, nasopharyngeal, cervical, endometrial pancreatic, and renal cancer. Basal, squamous cell and hepatocellular carcinoma. | 2,125 | (24) |
| Bostrom, 1993    |  | 6-mercaptopurine | Is converted to TIMP via the action of the enzyme hypoxanthine guanine phospho-ribosyltransferase. TIMP prevents the conversion of inosinic acid to xanthylic acid and adenylic acid, respectively. Therefore, it interferes with purine metabolism and blocks purine synthesis. Additionally, TIMP undergoes methylation to form MTIMP, which inhibits glutamine- | A range of hematological cancers, mostly for acute myeloid and lymphatic leukemia.                                                                                                                                 | 201   | (25) |

|                |  |                       |                                                                                                                                                                                                                                                                                                                                                                                                                                |                                                                                                                                            |       |      |
|----------------|--|-----------------------|--------------------------------------------------------------------------------------------------------------------------------------------------------------------------------------------------------------------------------------------------------------------------------------------------------------------------------------------------------------------------------------------------------------------------------|--------------------------------------------------------------------------------------------------------------------------------------------|-------|------|
|                |  |                       | 5-phosphoribosylpyrophosphate amidotransferase. The latter is the most important enzyme for purine ribonucleotide synthesis.                                                                                                                                                                                                                                                                                                   |                                                                                                                                            |       |      |
| Walko, 2005    |  | Capecitabine (Xeloda) | Requires activation to its cytotoxic derivative fluorouracil. The fluorouracil and methylenetetrahydrofolate bind covalently to thymidylate synthase, thus inhibiting thymidylate synthesis from uracil. They block DNA and RNA synthesis and promote cell death. Additionally, fluorouracil interacts with uridine triphosphate of RNA, leading to the disfunction of RNA processing and the inhibition of protein synthesis. | Breast, gastric, colorectal, pancreatic, biliary tract, thyroid and metastatic solid cancer. Hepatocellular and nasopharyngeal carcinomas. | 1,688 | (26) |
| Spurgeon, 2009 |  | Cladribine            | May undergo phosphorylation by deoxycytidine kinase and form intermediate metabolites, such as nucleotide cladribine triphosphate. The intermediate metabolites accumulate in specific cells (such as lymphocytes) that are saturated with deoxycytidine kinase, while they have less deoxynucleotidase. This reduces DNA synthesis, induces                                                                                   | Hematological cancers, such as acute myeloid leukemia and other myeloid neoplasms, and lymphomas.                                          | 82    | (27) |

|           |  |             |                                                                                                                                                                                                                                                                                                                                                                                                                                                                                                  |                                                                                                                 |     |      |
|-----------|--|-------------|--------------------------------------------------------------------------------------------------------------------------------------------------------------------------------------------------------------------------------------------------------------------------------------------------------------------------------------------------------------------------------------------------------------------------------------------------------------------------------------------------|-----------------------------------------------------------------------------------------------------------------|-----|------|
|           |  |             | <p>DNA strand breaks and blocks repair mechanisms. Additionally, high levels of the intermediate metabolites inhibit ribonucleotide reductase, which in turn leads to the inconsistency in dNTP pools, and induces DNA breaks, while reducing DNA repair and synthesis. It also leads to the depletion in ATP and NAD, and eventually causes cell death. Cladribine leads to the accumulation of cells at G<sub>1</sub> phase of the cell cycle, preventing them from entering into S phase.</p> |                                                                                                                 |     |      |
| Pui, 2005 |  | Clofarabine | <p>Is activated and converted to 5-monophosphate and 5-triphosphate via enzymatic actions of deoxycytidine kinase and mono/di phospho-kinases, respectively. These intermediate metabolites inhibit ribonucleotide reductase, thus depleting dNTP levels, and block DNA synthesis. They also compete with DNA polymerases leading to the termination of DNA elongation. Disrupting DNA repair mechanisms as the triphosphate</p>                                                                 | <p>Relapsed pediatric cancers, acute myeloid and lymphatic leukemia, and Hodgkin and non-Hodgkin lymphomas.</p> | 159 | (28) |



|               |  |            |                                                                                                                                                                                                                                                                                                                                                                                                                               |                                                                                                                                                                           |       |      |
|---------------|--|------------|-------------------------------------------------------------------------------------------------------------------------------------------------------------------------------------------------------------------------------------------------------------------------------------------------------------------------------------------------------------------------------------------------------------------------------|---------------------------------------------------------------------------------------------------------------------------------------------------------------------------|-------|------|
|               |  |            | metabolite incorporates into DNA strands during repairing process. It also affects mitochondrial membrane integrity, inducing the apoptotic pathway via the enhancement of releasing cytochrome C and pro-apoptotic factors.                                                                                                                                                                                                  |                                                                                                                                                                           |       |      |
| Murphy, 2017  |  | Cytarabine | Unknown specificity. It can inhibit DNA polymerase and may incorporate into RNA and DNA. Cytarabine has a specificity to kill cells in S phase of the cell cycle (DNA synthesis phase).                                                                                                                                                                                                                                       | A range of hematological cancers, such as acute and chronic myeloid leukemia, and lymphoblastic leukemia. At lower level for prostate, breast and brain cancers.          | 1,302 | (29) |
| Dhillon, 2020 |  | Decitabine | Upon activation, it is converted to decitabine triphosphate, which inhibits DNA methyltransferase upon direct integration into DNA strands. Therefore, it induces DNA hypomethylation (the methyltransferase leads to the methylation of newly synthesized DNA), and eventually drives the cells into apoptosis or cellular differentiation. The inhibition of DNA methylation but not DNA synthesis in cancer cells might be | Solid and hematological cancer, such as liver, ovarian, prostate, lung, breast, colorectal, head and neck, and pancreatic cancer, and acute and chronic myeloid leukemia. | 370   | (30) |

|                                |  |             |                                                                                                                                                                                                                                                                                                                                                                                                                                           |                                                                                                                     |       |         |
|--------------------------------|--|-------------|-------------------------------------------------------------------------------------------------------------------------------------------------------------------------------------------------------------------------------------------------------------------------------------------------------------------------------------------------------------------------------------------------------------------------------------------|---------------------------------------------------------------------------------------------------------------------|-------|---------|
|                                |  |             | crucial to restore normal gene function to control cellular proliferation and differentiation. Decitabine has a specificity to kill cells in the S phase of the cell cycle (DNA synthesis phase).                                                                                                                                                                                                                                         |                                                                                                                     |       |         |
| Floxuridine, 2012; Power, 2009 |  | Floxuridine | It is catabolized into an intermediate metabolite called 5-fluorouracil. The fluorouracil and methylenetetrahydrofolate bind covalently to thymidylate synthase, thus inhibiting thymidylate synthesis from uracil. They block DNA and RNA synthesis and promote cell death. Additionally, fluorouracil interacts with uridine triphosphate of RNA, leading to the disfunction of RNA processing and the inhibition of protein synthesis. | Metastatic cancer and gastrointestinal, colorectal, ovarian, liver, esophageal, nasopharyngeal and appendix cancer. | 59    | (31,32) |
| Anderson, 2007                 |  | Fludarabine | It enters phosphorylation/dephosphorylation cycles, and produces several intermediate metabolites ending with an active intracellular form called triphosphate, 2-fluoro-ara-ATP. This active metabolite inhibits several enzymes, such as                                                                                                                                                                                                | Hematologic malignancies.                                                                                           | 1,385 | (33)    |

|                      |  |              |                                                                                                                                                                                                                                                                                                                                                                                                                        |                                                                                                                                                                                                                                        |       |      |
|----------------------|--|--------------|------------------------------------------------------------------------------------------------------------------------------------------------------------------------------------------------------------------------------------------------------------------------------------------------------------------------------------------------------------------------------------------------------------------------|----------------------------------------------------------------------------------------------------------------------------------------------------------------------------------------------------------------------------------------|-------|------|
|                      |  |              | ribonucleotide reductase, DNA polymerase $\alpha$ and primase, leading to the inhibition of DNA synthesis.                                                                                                                                                                                                                                                                                                             |                                                                                                                                                                                                                                        |       |      |
| Mini,<br>2006        |  | Gemcitabine  | It is activated and converted into two reactive metabolites gemcitabine diphosphate and triphosphate. The diphosphate metabolite inhibits ribonucleotide reductase, whereas the triphosphate integrates into DNA upon competing with endogenous deoxy nucleoside triphosphates. The metabolites can also induce thymidylate synthetase inhibition. Altogether, the drug inhibits DNA synthesis and induces cell death. | Advanced and metastatic solid cancer, such as pancreatic, ovarian, lung, bladder, breast, urethral and testicular, endometrial, biliary tract, colorectal, esophageal, and head and neck cancer. Squamous cell carcinoma and lymphoma. | 2,521 | (34) |
| Madaan<br>K, 2012    |  | Hydroxyurea  | It is converted into free radical NO, which in turn inactivates ribonucleotide reductase upon quenching tyrosyl free radicals. Therefore, it depletes dNTP levels and blocks DNA synthesis. Hydroxyurea also inhibits DNA repair mechanisms.                                                                                                                                                                           | Myeloid leukemias, such as chronic and acute myeloid leukemia. Head and neck, brain, squamous cell, esophageal and cervical cancer.                                                                                                    | 123   | (35) |
| Gervasini<br>G, 2019 |  | Methotrexate | Upon the action of foylpolylglutamate, methotrexate is                                                                                                                                                                                                                                                                                                                                                                 | Pediatric cancers, gestational choriocarcinoma, and head and neck,                                                                                                                                                                     | 953   | (36) |

|             |  |            |                                                                                                                                                                                                                                                                                                                                                                                                                                                                                                                                                                                                                                                 |                                                                                                                                                                          |    |      |
|-------------|--|------------|-------------------------------------------------------------------------------------------------------------------------------------------------------------------------------------------------------------------------------------------------------------------------------------------------------------------------------------------------------------------------------------------------------------------------------------------------------------------------------------------------------------------------------------------------------------------------------------------------------------------------------------------------|--------------------------------------------------------------------------------------------------------------------------------------------------------------------------|----|------|
|             |  |            | <p>activated and converted to methotrexate polyglutamate. This active metabolite inhibits several enzymes essential for nucleotide synthesis, such as thymidylate synthase, dihydrofolate reductase, amido phosphoribosyltransferase and AICART. Therefore, it blocks nucleic acid synthesis, prevents cell division and induces cell death. Additionally, inhibition of AICART has been shown to have an anti-inflammatory effect in rheumatoid arthritis. This may suggest an additional effect of methotrexate in modulation of the cancer microenvironment and anticancer immunity; however, this requires more studies and validation.</p> | <p>breast, lung, colorectal, ovarian, bladder, and brain cancer. Hematological cancer, such as advanced non-Hodgkin's lymphoma, acute lymphatic leukemia and others.</p> |    |      |
| Kadia, 2017 |  | Nelarabine | <p>Upon activation, produces intermediate metabolites (ara-GTP), which integrates into DNA competing with endogenous deoxyGTP. This will stop DNA elongation and induce cellular destruction and apoptosis. The</p>                                                                                                                                                                                                                                                                                                                                                                                                                             | <p>Hematological cancers, especially T cell lymphoblastic leukemia and lymphoma in children and adults.</p>                                                              | 27 | (37) |

|                                       |  |             |                                                                                                                                                                                                                                                                                                                                                                                                                                        |                                                                                                                                              |     |         |
|---------------------------------------|--|-------------|----------------------------------------------------------------------------------------------------------------------------------------------------------------------------------------------------------------------------------------------------------------------------------------------------------------------------------------------------------------------------------------------------------------------------------------|----------------------------------------------------------------------------------------------------------------------------------------------|-----|---------|
|                                       |  |             | cytotoxicity of nelarabine has cell cycle S-phase specificity.                                                                                                                                                                                                                                                                                                                                                                         |                                                                                                                                              |     |         |
| Rossi G,<br>2018<br>Seitz JF,<br>2004 |  | Pemetrexed  | Upon activation it produces intermediate metabolites (polyglutamate forms) via folylpolyglutamate synthetase activity. This active metabolite inhibits several enzymes, such as glycinamide ribonucleotide formyltransferase, thymidylate synthase and dihydrofolate reductase, which have essential roles in purine and thymidine biosynthesis. Therefore, it prevents DNA synthesis, and cell division, while it induces cell death. | Lung (mostly, non-small cell, pleural mesothelioma), pancreatic, head and neck, esophageal, breast, colorectal, ovarian, and gastric cancer. | 845 | (38,39) |
| Spiers,<br>1996                       |  | Pentostatin | It inhibits adenosine deaminase enzymatic activity, leading to the accumulation of adenosine and deoxyadenosine, and the inhibition of ribonucleotide reductase, thus blocking DNA synthesis. Additionally, it may incorporate into DNA and RNA by competing with purine base, thus exerting cytotoxic activity. The drug has cell cycle-S-phase specificity.                                                                          | Leukemias, lymphomas, bladder and urothelial cancer, and multiple myeloma.                                                                   | 46  | (40)    |

|                  |  |              |                                                                                                                                                                                                                                                                                                                                                                                                                                                                               |                                                                                                                                                                  |    |      |
|------------------|--|--------------|-------------------------------------------------------------------------------------------------------------------------------------------------------------------------------------------------------------------------------------------------------------------------------------------------------------------------------------------------------------------------------------------------------------------------------------------------------------------------------|------------------------------------------------------------------------------------------------------------------------------------------------------------------|----|------|
| Dondi A,<br>2014 |  | Pralatrexate | It is highly effective against cells that are actively dividing and express high levels of reduced folate carrier protein-1, which permits the entrance of the drug into the cell. Upon activation (via catalytic activity of folypolyglutamate synthase), it inhibits thymidylate synthase and dihydrofolate reductase. This will lead to reduced thymidine monophosphate levels, thus blocking DNA and RNA synthesis. It prevents cell proliferation and induces apoptosis. | Relapsed lymphomas, in particular peripheral T cell and NK cell lymphomas, relapsed leukemias, and solid cancer, such as head and neck, lung, and breast cancer. | 37 | (41) |
| Munshi,<br>2014  |  | Thioguanine  | It represents a favorable substrate for hypoxanthine-guanine phosphoribosyltransferase (competing with guanine and hypoxanthine). Upon enzymatic activity, it is converted to 6-thioguanilyc monophosphate, which inhibits purine synthesis by preventing the enzymatic action of glutamine-5-phosphoribosylpyrophosphate amidotransferase. The reactive metabolite competes with IMP                                                                                         | Leukemias, such as acute myeloid leukemia, Hodgkin and non-Hodgkin lymphomas, and brain and urothelial cancer.                                                   | 88 | (42) |

|               |                        |              |                                                                                                                                                                                                                                                                                                                                                                                                                                                |                                                                                                                                                                      |     |      |
|---------------|------------------------|--------------|------------------------------------------------------------------------------------------------------------------------------------------------------------------------------------------------------------------------------------------------------------------------------------------------------------------------------------------------------------------------------------------------------------------------------------------------|----------------------------------------------------------------------------------------------------------------------------------------------------------------------|-----|------|
|               |                        |              | dehydrogenase and inhibits the conversion of IMP to XMP. It also integrates into both the DNA and the RNA via phosphodiester bonds. Altogether, it prevents purine synthesis and cell division, while it induces cell death.                                                                                                                                                                                                                   |                                                                                                                                                                      |     |      |
| Burness, 2016 |                        | Trifluridine | It is converted to active intermediate metabolites (trifluridine monophosphate then triphosphate forms) upon phosphorylation via thymidine kinase. The triphosphate form incorporates into DNA, disturbs DNA function and synthesis, and inhibits cell division. The monophosphate metabolite, in turn, inhibits thymidylate synthetase, which is crucial for DNA synthesis as its expression is upregulated in a number of cancer cell lines. | Metastatic colorectal, rectal, metastatic breast, advanced bile duct and gallbladder, gastrointestinal, and esophageal cancer.                                       | 39  | (43) |
| Kim, 2018     | Anticancer antibiotics | Daunorubicin | They intercalate the base pairs and thus form complexes with DNA. They also reduce the activity of topoisomerase II by stabilizing the complex of topoisomerase II-DNA.                                                                                                                                                                                                                                                                        | Hematological cancer, such as acute myeloid leukemia, acute monocytic, chronic myeloid and acute lymphocytic leukemia. To a lesser extent, liver cancer and sarcoma. | 380 | (44) |

|                                    |             |                                                                                                                                                                                                                                       |                                                                                                                                                                                                      |       |         |
|------------------------------------|-------------|---------------------------------------------------------------------------------------------------------------------------------------------------------------------------------------------------------------------------------------|------------------------------------------------------------------------------------------------------------------------------------------------------------------------------------------------------|-------|---------|
| Rivankar S, 2014<br>Speth PA, 1988 | Doxorubicin | As a result, they disturb DNA unwinding and prevent DNA replication and transcription (they may inhibit DNA helicase activity, too). Therefore, they inhibit mitotic cell division and have cytotoxic activity.                       | Acute lymphoblastic and myeloid leukemia, Hodgkin lymphoma, Wilms' cancer, neuroblastoma, sarcomas, and breast, ovarian, bladder, thyroid, liver, gastric, and primary and metastatic breast cancer. | 2,127 | (45,46) |
| Conte, 2000<br>Petrioli R, 2008    | Epirubicin  |                                                                                                                                                                                                                                       | Mainly for breast cancer. Also, prostate, lung, gastric, esophageal, liver, pancreatic, gallbladder and urinary bladder cancer.                                                                      | 504   | (47,48) |
| Hollingshead LM, 1991              | Idarubicin  |                                                                                                                                                                                                                                       | Leukemia, multiple myeloma and hepatocellular carcinoma.                                                                                                                                             | 257   | (49)    |
| Onrust SV, 1999                    | Valrubicin  | It intercalates with DNA and disturbs nucleic acid metabolism, preventing the nucleosides integration into nucleic acid. It induces chromosomal destruction and inhibits cell division in the G <sub>2</sub> phase of the cell cycle. | Mainly bladder cancer.                                                                                                                                                                               | 9     | (50)    |
| Froudarakis, 2013                  | Bleomycin   | It chelates iron and other metal ions, assimilating an enzyme that produces free radicals (hydroxide and superoxide) upon reacting with oxygen. As a result, it damages and                                                           | Lung and trachea cancer, squamous cell carcinoma, Hodgkin and non-Hodgkin lymphoma, cervical, head and neck, ovarian, and testicular cancer, germ cell cancers, and early Kaposi sarcoma.            | 186   | (51)    |



|                                 |                            |                                                              |                                                                                                                                                                                                                                               |                                                                                                                                                        |       |         |
|---------------------------------|----------------------------|--------------------------------------------------------------|-----------------------------------------------------------------------------------------------------------------------------------------------------------------------------------------------------------------------------------------------|--------------------------------------------------------------------------------------------------------------------------------------------------------|-------|---------|
|                                 |                            |                                                              | cleaves DNA and prevents its synthesis.                                                                                                                                                                                                       |                                                                                                                                                        |       |         |
| Veal, 2005                      |                            | Dactinomycin                                                 | It incorporates with DNA, preventing RNA synthesis by blocking the RNA polymerase.                                                                                                                                                            | Wilms' cancers, childhood rhabdomyosarcoma, gestational trophoblastic cancers, Ewing's sarcoma, testicular, germ cell and kidney cancer, and melanoma. | 54    | (52)    |
| Volpe, 2010<br>Guadagni S, 2017 |                            | Mitomycin-C                                                  | Upon activation, it crosslinks DNA strands, thus inhibiting DNA function and synthesis.                                                                                                                                                       | Bladder, lip, oral cavity, pharynx and esophagus cancer. Gastric, peritoneum, breast, pancreatic, biliary tract, colorectal, liver and lung cancer.    | 214   | (53,54) |
| Fox EJ, 2004                    |                            | Mitoxantrone<br>(also considered as topoisomerase inhibitor) | Interferes with RNA, binds and intercalates crosslinked DNA strands, and breaks them. It is also a potent topoisomerase II inhibitor, preventing DNA unwinding and replication. It can affect both proliferating and non-proliferating cells. | Prostate, breast, ovarian and lung cancer, acute myeloid leukemia and follicular lymphoma.                                                             | 298   | (55)    |
| Bailly, 2019                    | Topoisomerase I inhibitors | Irinotecan                                                   | It binds to the complex of topoisomerase I and DNA, preventing DNA relegation. Prevents DNA unwinding via interference with the replication fork and induces lethal DNA strand                                                                | Metastatic colorectal and pancreatic, small cell lung, cervical, breast, and gastric cancer.                                                           | 1,485 | (56)    |

|                                 |                              |             |                                                                                                                                                                                                                                                                                                                                   |                                                                                                                                                                                                                              |       |         |
|---------------------------------|------------------------------|-------------|-----------------------------------------------------------------------------------------------------------------------------------------------------------------------------------------------------------------------------------------------------------------------------------------------------------------------------------|------------------------------------------------------------------------------------------------------------------------------------------------------------------------------------------------------------------------------|-------|---------|
|                                 |                              |             | breaks. Such non-repairable defects will induce cell death (apoptosis).                                                                                                                                                                                                                                                           |                                                                                                                                                                                                                              |       |         |
| Lihua P, 2008<br>Nicum SJ, 2007 |                              | Topotecan   | It is an uncompetitive inhibitor that binds to the enzyme-substrate complex and induces DNA base pairing. It prevents DNA ligation at the cleavage site. Such non-repairable defects will induce cell death (apoptosis).                                                                                                          | Advanced carcinoma, ovarian, lung (small cell lung), cervical and endometrial cancer, neuroblastoma, relapsed brain cancer in children and leukemia.                                                                         | 400   | (57,58) |
| Baldwin EL, 2005                | Topoisomerase II inhibitors  | Etoposide   | It inhibits topoisomerase II by preventing DNA ligation, thus inducing apoptosis. This drug can inhibit both $\alpha$ and $\beta$ isoforms of the enzyme, thus it has therapeutic and anticarcinogenic effects, respectively. It has cell cycle specificity, targeting cells at the S and G <sub>2</sub> phase of the cell cycle. | Testicular cancers, small cell and non-small cell lung, childhood kidney, gastrointestinal, breast, prostate, and ovarian cancer, germ cell cancers, brain metastasis, lymphoma, non-lymphocytic leukemia, and glioblastoma. | 1,482 | (59)    |
| Sonneveld, 1992                 |                              | Teniposide  | Directly binds to topoisomerase II, inhibiting its enzymatic activity and inducing DNA double strand breaks. It also exerts cytotoxic activity (cell death).                                                                                                                                                                      | Acute lymphoblastic leukemia, lymphomas, pediatric leukemia and lymphoma. Lung and brain cancer.                                                                                                                             | 21    | (60)    |
| Di Nunno V, 2020                | Mitotic inhibitors (taxanes) | Cabazitaxel | It inhibits microtubule disassembly while inducing its assembly, which leads to microtubule stabilization. It                                                                                                                                                                                                                     | Metastatic prostate cancer. Also, breast, gastric, colorectal, esophageal, head and neck, lung, urothelial, and ovarian cancer.                                                                                              | 119   | (61)    |

|                |                                      |                |                                                                                                                                                                                                                                                                                                                                                |                                                                                                                                                                                                                                          |       |      |
|----------------|--------------------------------------|----------------|------------------------------------------------------------------------------------------------------------------------------------------------------------------------------------------------------------------------------------------------------------------------------------------------------------------------------------------------|------------------------------------------------------------------------------------------------------------------------------------------------------------------------------------------------------------------------------------------|-------|------|
|                |                                      |                | sequesters the cell at the metaphase preventing its progression within the cell cycle, and thus initiates apoptotic activity.                                                                                                                                                                                                                  |                                                                                                                                                                                                                                          |       |      |
| Varnai, 2019   |                                      | Docetaxel      | By attaching to the tubulin subunit, it stabilizes and arrests dynamic instability of microtubules. Therefore, it blocks a number of cellular activities such as mitosis where the microtubules are vital for chromosomal alignments and the formation of the mitotic spindle. It also induces apoptosis by inhibiting Bcl-2 protein function. | Breast, ovarian, non-small cell lung and prostate cancer. Also, gastric, head and neck, pancreatic, esophageal, and bladder cancer.                                                                                                      | 2,449 | (62) |
| Weaver, 2014   |                                      | Paclitaxel     |                                                                                                                                                                                                                                                                                                                                                | Platinum-resistant ovarian cancer, Kaposi's sarcoma, lung, breast and gastric cancer.                                                                                                                                                    | 3,424 | (63) |
| Yardley, 2013  |                                      | Nab-paclitaxel |                                                                                                                                                                                                                                                                                                                                                | Advanced pancreatic cancer. Also, other advanced cancers, such as gastric, breast, and lung cancer.                                                                                                                                      |       | (64) |
| Chong, 1988    | Mitotic inhibitors (Vinca alkaloids) | Vinblastine    | It interacts with tubulin and binds to the mitotic spindle, leading to microtubule crystallization, and induces cell death or growth arrest.                                                                                                                                                                                                   | Solid cancers, such as bladder, urethral, testicular, kidney, breast, non-small cell lung, and head and neck cancer, and melanomas. Lymphomas, neuroblastoma, Hodgkin and non-Hodgkin lymphomas, childhood cancer, and Kaposi's sarcoma. | 198   | (65) |
| Moore AS, 2011 |                                      | Vincristine    | It inhibits mitosis at metaphase by interacting with tubulin. Vincristine can interfere with lipid and nucleic acid synthesis, and affects cyclic AMP, glutathione and amino acid                                                                                                                                                              | Childhood cancer, acute lymphocytic leukemia, Hodgkin and non-Hodgkin lymphomas, Wilms' cancers, neuroblastoma, and rhabdomyosarcoma.                                                                                                    | 1,108 | (66) |

|                            |                 |                     |                                                                                                                                                                                                                                                                                                                         |                                                                                                                                                                                                                |       |         |
|----------------------------|-----------------|---------------------|-------------------------------------------------------------------------------------------------------------------------------------------------------------------------------------------------------------------------------------------------------------------------------------------------------------------------|----------------------------------------------------------------------------------------------------------------------------------------------------------------------------------------------------------------|-------|---------|
|                            |                 |                     | metabolism. It may also interfere with Ca <sup>2+</sup> -transport ATPase activity as well as with cellular respiration.                                                                                                                                                                                                |                                                                                                                                                                                                                |       |         |
| Capasso, 2012              |                 | Vinorelbine         | It inhibits mitosis at metaphase by interacting with tubulin. It stops cells at the G <sub>2</sub> -M phase at concentrations close to the IC <sub>50</sub> . It also induces apoptosis by inhibiting Bcl-2 protein function by reducing the formation of heterodimers between Bcl-2 and the pro-apoptotic protein BAX. | Advanced breast and non-small cell lung cancer, relapsed Hodgkin lymphoma, relapsed ovarian, and head and neck cancer. Prostate and brain cancer, Wilms' cancers, sarcoma, and esophageal and cervical cancer. | 459   | (67)    |
| Frey, 1990                 | Corticosteroids | Prednisone          | They bind to glucocorticoid receptor inducing downstream gene expression and signaling effects. For example, inhibiting phospholipase A2 reduces the synthesis of arachidonic acid and its derivatives.                                                                                                                 | Mostly prostate cancer and multiple myeloma. Also, cancers of the kidney, breast, lung, head and neck, and leukemia and lymphoma.                                                                              | 1,076 | (68)    |
| Bruera, 1985               |                 | Methyl-prednisolone | They inhibit the expression of inflammatory transcription factors, such as NF-κB, while they may promote anti-inflammatory genes, such as interleukin-10. They can also bind to the estrogen receptor                                                                                                                   | Hodgkin and non-Hodgkin lymphoma. Leukemia, such as chronic and acute lymphatic leukemia, and multiple myeloma. Prostate, breast, lung, ovarian, and head and neck cancer.                                     | 432   | (69)    |
| Burki, 2018; Bertoli, 2018 |                 | Dexamethasone       |                                                                                                                                                                                                                                                                                                                         | Mostly multiple myeloma and lymphomas. Chronic and acute lymphatic leukemia, and acute myeloid leukemia. Prostate, breast, lung and ovarian cancers.                                                           | 1,762 | (70,71) |

|                                      |        |                                     |                                                                                                                                                                                                                                                                                                                             |                                                                                                                    |     |         |
|--------------------------------------|--------|-------------------------------------|-----------------------------------------------------------------------------------------------------------------------------------------------------------------------------------------------------------------------------------------------------------------------------------------------------------------------------|--------------------------------------------------------------------------------------------------------------------|-----|---------|
| Kantoff,<br>1999<br>Nazer L,<br>2015 |        | Hydrocortisone                      | preventing estrogen from inducing cell proliferation.                                                                                                                                                                                                                                                                       | Breast, prostate and colorectal cancer, multiple myeloma, acute myeloid and lymphoblastic leukemia, and lymphomas. | 408 | (72,73) |
| Siddikuzz<br>aman,,<br>2011          | Others | All-trans-retinoic acid (tretinoin) | The exact mechanism of action is unknown. It has been demonstrated that it binds to three retinoic acid receptors ( $\alpha$ , $\beta$ and $\gamma$ ) and induces cellular differentiation, while it reduces the proliferation rate.                                                                                        | Acute promyelocytic leukemia. Breast, lung, skin cancer and leukemia.                                              | 138 | (74)    |
| Hoonjan,<br>2018                     |        | Arsenic trioxide                    | The exact mechanism of action is unknown. It may induce apoptosis by enhancing DNA fragmentation and terminal differentiation by degrading the fusion of promyelotic leukemia/retinoic acid receptor $\alpha$ protein.                                                                                                      | Mainly acute promyelocytic leukemia. Also, prostate, cervical, liver, germ cell, kidney and breast cancer.         | 124 | (75)    |
| Asselin,<br>2015                     |        | Asparaginase                        | Converts asparagine to aspartic acid and ammonia. This reduces the level of asparagine in the plasma and specifically harms the cancer cells. Unlike normal cells, some types of cancer cells lack the asparagine synthetase enzymatic activity and thus are incapable of converting aspartic acid to asparagine, thus they | Leukemia, mainly acute lymphoblastic leukemia. Less likely, pancreatic, breast and ovarian cancer.                 | 259 | (76)    |

|               |  |             |                                                                                                                                                                                                                                                                             |                                                                                                            |     |      |
|---------------|--|-------------|-----------------------------------------------------------------------------------------------------------------------------------------------------------------------------------------------------------------------------------------------------------------------------|------------------------------------------------------------------------------------------------------------|-----|------|
|               |  |             | rely on exogenous asparagine. Asparaginase eliminates exogenous asparagine, which is crucial for protein, DNA and RNA synthesis. This will lead to cell proliferation inhibition and cell death activation.                                                                 |                                                                                                            |     |      |
| Swami, 2015   |  | Eribulin    | It sequesters and produces nonproductive aggregates of tubulin, thus inhibiting the microtubule growth phase, while the shortening phase remains unaffected. Blocks the G <sub>2</sub> /M cell-cycle and disrupts the mitotic spindle, which leads to apoptotic cell death. | Mostly relapsed metastatic breast cancer. Also lung, and head and neck cancer.                             | 168 | (77) |
| De Luca, 2015 |  | Ixabepilone | It binds to $\beta$ -tubulin and stabilizes microtubules. This prevents and stops the cells from ordinary cell division. It also binds to the $\alpha\beta$ -tubulin heterodimer decreasing the dissociation rate and stabilizing microtubules.                             | Breast, head and neck, prostate and lung cancer, melanoma, non-Hodgkin lymphoma, and renal cell carcinoma. | 120 | (78) |
| Waszut, 2017  |  | Mitotane    | Unknown. It may suppress the adrenal cortex and modify steroid metabolism.                                                                                                                                                                                                  | Adrenocortical cancers. Less likely, bladder and urothelial cancer.                                        | 18  | (79) |

|                    |  |              |                                                                                                                                                                                                                                                                                         |                                                                                                     |     |      |
|--------------------|--|--------------|-----------------------------------------------------------------------------------------------------------------------------------------------------------------------------------------------------------------------------------------------------------------------------------------|-----------------------------------------------------------------------------------------------------|-----|------|
| Winer,<br>2018     |  | Omacetaxine  | It prevents protein synthesis by binding to the A-site cleft of the large ribosomal subunit.                                                                                                                                                                                            | Leukemia, specifically chronic myeloid leukemia.                                                    | 18  | (80) |
| Heo YA,<br>2019    |  | Pegaspargase | Prevents the cancer cells from utilizing the exogenous source of asparagine by converting it to aspartic acid and ammonia. This may lead to cancer cell death especially if cell has no endogenous asparagine synthesis capability.                                                     | Leukemia and lymphomas, specifically acute lymphoblastic leukemia.                                  | 166 | (81) |
| Goerne,<br>2008    |  | Procarbazine | It may inhibit t-RNA synthesis and function by preventing the transmethylation of methyl groups of methionine. This leads to the inhibition of RNA and protein synthesis. It may also produce hydrogen peroxide, which can damage DNA directly.                                         | Mostly lymphomas and brain cancers.                                                                 | 81  | (82) |
| Smolewski,<br>2017 |  | Romidepsin   | The drug gets activated only when it enters the cell. It has a specific action against cancer cells that have high histone deacetylase activity. Upon conversion to the active metabolite, it binds to the zinc ions of the active site on histone deacetylases and eventually inhibits | Mainly T cell lymphoma, leukemia, and advanced breast, lung, pancreas, colorectal and ovary cancer. | 90  | (83) |

|              |  |            |                                                                                                                                                                                                                                                                                                |                                                                                                             |     |      |
|--------------|--|------------|------------------------------------------------------------------------------------------------------------------------------------------------------------------------------------------------------------------------------------------------------------------------------------------------|-------------------------------------------------------------------------------------------------------------|-----|------|
|              |  |            | its activity. Such inhibition may lead to growth arrest and apoptosis as it restores the normal gene expression phenotype in cancer cells.                                                                                                                                                     |                                                                                                             |     |      |
| Richon, 2010 |  | Vorinostat | The exact mechanism is unknown. It has a specific action against cancer cells that have high histone deacetylase activity. It can inhibit the histone deacetylase activity, which may lead to growth arrest and apoptosis as it restores the normal gene expression phenotype in cancer cells. | Mostly lymphoma and leukemia. Lung, breast, kidney, bladder, pancreatic, gastric, and head and neck cancer. | 257 | (84) |

AICART, aminoimidazole caboxamide ribonucleotide transformylase; IMP, inosinic acid; n/a, not applicable; TIMP, thioinosine monophosphate; XMP, xanthylic acid.

## References

1. Lee CR and Faulds D: Altretamine. A review of its pharmacodynamic and pharmacokinetic properties, and therapeutic potential in cancer chemotherapy. *Drugs* 49: 932-953, 1995.
2. Bendamustine. In: *Drugs and Lactation Database (LactMed)* National Library of Medicine (US), Bethesda (MD)2006.
3. Dechant KL, Brogden RN, Pilkington T and Faulds D: Ifosfamide/mesna. A review of its antineoplastic activity, pharmacokinetic properties and therapeutic efficacy in cancer. *Drugs* 42: 428-467, 1991.



4. O'Marcaigh AS and Betcher DL: Busulfan. *Journal of pediatric oncology nursing : official journal of the Association of Pediatric Oncology Nurses* 13: 150-152, 1996.
5. Fox LE: Carboplatin. *Journal of the American Animal Hospital Association* 36: 13-14, 2000.
6. Vidal L, Gurion R, Ram R, et al.: Chlorambucil for the treatment of patients with chronic lymphocytic leukemia (CLL) - a systematic review and meta-analysis of randomized trials. *Leukemia & lymphoma* 57: 2047-2057, 2016.
7. Dasari S and Tchounwou PB: Cisplatin in cancer therapy: molecular mechanisms of action. *European journal of pharmacology* 740: 364-378, 2014.
8. Emadi A, Jones RJ and Brodsky RA: Cyclophosphamide and cancer: golden anniversary. *Nature reviews. Clinical oncology* 6: 638-647, 2009.
9. Nichols DE: *Synthesis of Essential Drugs* By Ruben Vardanyan and Victor Hruby. Elsevier, Amsterdam, The Netherlands. 2006. xvi + 617 pp. 17 × 24.5 cm. ISBN 10 0-444-52166-6. \$240.00. *Journal of Medicinal Chemistry* 49: 7554-7555, 2006.
10. Thirumaran R, Prendergast GC and Gilman PB: Chapter 7 - Cytotoxic Chemotherapy in Clinical Treatment of Cancer. In: *Cancer Immunotherapy*. Prendergast GC and Jaffee EM (eds.) Academic Press, Burlington, pp 101-116, 2007.
11. Koprowska K and Czyż M: [Dacarbazine, a chemotherapeutic against metastatic melanoma and a reference drug for new treatment modalities]. *Postepy higieny i medycyny doswiadczalnej (Online)* 65: 734-751, 2011.
12. Riddell IA: Cisplatin and Oxaliplatin: Our Current Understanding of Their Actions. *Metal ions in life sciences* 18:2018.
13. Thomas A, Tanaka M, Trepel J, Reinhold WC, Rajapakse VN and Pommier Y: Temozolomide in the Era of Precision Medicine. *Cancer research* 77: 823-826, 2017.
14. Beilke LD: Thiotepa. In: *Encyclopedia of Toxicology (Third Edition)*. Wexler P (ed.) Academic Press, Oxford, pp 551-552, 2014.
15. Carter NJ and Keam SJ: Trabectedin : a review of its use in the management of soft tissue sarcoma and ovarian cancer. *Drugs* 67: 2257-2276, 2007.

16. Pai VB and Nahata MC: Cardiotoxicity of chemotherapeutic agents: incidence, treatment and prevention. *Drug safety* 22: 263-302, 2000.
17. Krug S, Boch M, Daniel H, et al.: Streptozocin-Based Chemotherapy in Patients with Advanced Neuroendocrine Neoplasms-- Predictive and Prognostic Markers for Treatment Stratification. *PloS one* 10: e0143822, 2015.
18. Nikolova T, Roos WP, Krämer OH, Strik HM and Kaina B: Chloroethylating nitrosoureas in cancer therapy: DNA damage, repair and cell death signaling. *Biochimica et biophysica acta. Reviews on cancer* 1868: 29-39, 2017.
19. Lombardi G, Farina P, Della Puppa A, et al.: An overview of fotemustine in high-grade gliomas: from single agent to association with bevacizumab. *BioMed research international* 2014: 698542, 2014.
20. Endo T, Inoue T, Sugiyama S, Saito R and Tominaga T: Regression of Recurrent Spinal Cord High-Grade Glioma After Convection-Enhanced Delivery of Nimustine Hydrochloride: Case Reports and Literature Review. *Operative neurosurgery (Hagerstown, Md.)* 18: 451-459, 2020.
21. Kameoka Y, Akagi T, Murai K, et al.: Safety and efficacy of high-dose ranimustine (MCNU) containing regimen followed by autologous stem cell transplantation for diffuse large B-cell lymphoma. *International journal of hematology* 108: 510-515, 2018.
22. Kennedy BJ and Theologides A: Uracil Mustard, a New Alkylating Agent for Oral Administration in the Management of Patients with Leukemia and Lymphoma. *New England Journal of Medicine* 264: 790-793, 1961.
23. El Fakih R, Komrokji R, Shaheen M, Almohareb F, Rasheed W and Hassanein M: Azacitidine Use for Myeloid Neoplasms. *Clinical lymphoma, myeloma & leukemia* 18: e147-e155, 2018.
24. Longley DB, Harkin DP and Johnston PG: 5-fluorouracil: mechanisms of action and clinical strategies. *Nature reviews. Cancer* 3: 330-338, 2003.
25. Bostrom B and Erdmann G: Cellular pharmacology of 6-mercaptopurine in acute lymphoblastic leukemia. *The American journal of pediatric hematology/oncology* 15: 80-86, 1993.
26. Walko CM and Lindley C: Capecitabine: a review. *Clinical therapeutics* 27: 23-44, 2005.

27. Spurgeon S, Yu M, Phillips JD and Epner EM: Cladribine: not just another purine analogue? Expert opinion on investigational drugs 18: 1169-1181, 2009.
28. Pui CH and Jeha S: Clofarabine. Nature reviews. Drug discovery Suppl: S12-13, 2005.
29. Murphy T and Yee KWL: Cytarabine and daunorubicin for the treatment of acute myeloid leukemia. Expert opinion on pharmacotherapy 18: 1765-1780, 2017.
30. Dhillon S: Decitabine/Cedazuridine: First Approval. Drugs 80: 1373-1378, 2020.
31. Floxuridine. In: LiverTox: Clinical and Research Information on Drug-Induced Liver Injury National Institute of Diabetes and Digestive and Kidney Diseases, Bethesda (MD)2012.
32. Power DG and Kemeny NE: The role of floxuridine in metastatic liver disease. Molecular cancer therapeutics 8: 1015-1025, 2009.
33. Anderson VR and Perry CM: Fludarabine: a review of its use in non-Hodgkin's lymphoma. Drugs 67: 1633-1655, 2007.
34. Mini E, Nobili S, Caciagli B, Landini I and Mazzei T: Cellular pharmacology of gemcitabine. Annals of oncology : official journal of the European Society for Medical Oncology 17 Suppl 5: v7-12, 2006.
35. Madaan K, Kaushik D and Verma T: Hydroxyurea: a key player in cancer chemotherapy. Expert review of anticancer therapy 12: 19-29, 2012.
36. Gervasini G and Mota-Zamorano S: Clinical Implications of Methotrexate Pharmacogenetics in Childhood Acute Lymphoblastic Leukaemia. Current drug metabolism 20: 313-330, 2019.
37. Kadia TM and Gandhi V: Nelarabine in the treatment of pediatric and adult patients with T-cell acute lymphoblastic leukemia and lymphoma. Expert review of hematology 10: 1-8, 2017.
38. Rossi G, Alama A, Genova C, et al.: The evolving role of pemetrexed disodium for the treatment of non-small cell lung cancer. Expert opinion on pharmacotherapy 19: 1969-1976, 2018.
39. Seitz JF, Dahan L and Ries P: Pemetrexed in pancreatic cancer. Oncology (Williston Park, N.Y.) 18: 43-47, 2004.

40. Spiers AS: Deoxycoformycin (pentostatin): clinical pharmacology, role in the chemotherapy of cancer, and use in other diseases. *Haematologia* 27: 55-84, 1996.
41. Dondi A, Bari A, Pozzi S, Ferri P and Sacchi S: The potential of pralatrexate as a treatment of peripheral T-cell lymphoma. *Expert opinion on investigational drugs* 23: 711-718, 2014.
42. Munshi PN, Lubin M and Bertino JR: 6-thioguanine: a drug with unrealized potential for cancer therapy. *The oncologist* 19: 760-765, 2014.
43. Burness CB and Duggan ST: Trifluridine/Tipiracil: A Review in Metastatic Colorectal Cancer. *Drugs* 76: 1393-1402, 2016.
44. Kim M and Williams S: Daunorubicin and Cytarabine Liposome in Newly Diagnosed Therapy-Related Acute Myeloid Leukemia (AML) or AML With Myelodysplasia-Related Changes. *The Annals of pharmacotherapy* 52: 792-800, 2018.
45. Rivankar S: An overview of doxorubicin formulations in cancer therapy. *Journal of cancer research and therapeutics* 10: 853-858, 2014.
46. Speth PA, van Hoesel QG and Haanen C: Clinical pharmacokinetics of doxorubicin. *Clinical pharmacokinetics* 15: 15-31, 1988.
47. Conte PF, Gennari A, Landucci E and Orlandini C: Role of epirubicin in advanced breast cancer. *Clinical breast cancer* 1 Suppl 1: S46-51, 2000.
48. Petrioli R, Fiaschi AI, Francini E, Pascucci A and Francini G: The role of doxorubicin and epirubicin in the treatment of patients with metastatic hormone-refractory prostate cancer. *Cancer treatment reviews* 34: 710-718, 2008.
49. Hollingshead LM and Faulds D: Idarubicin. A review of its pharmacodynamic and pharmacokinetic properties, and therapeutic potential in the chemotherapy of cancer. *Drugs* 42: 690-719, 1991.
50. Onrust SV and Lamb HM: Valrubicin. *Drugs & aging* 15: 69-75; discussion 76, 1999.
51. Froudarakis M, Hatzimichael E, Kyriazopoulou L, et al.: Revisiting bleomycin from pathophysiology to safe clinical use. *Critical reviews in oncology/hematology* 87: 90-100, 2013.

52. Veal GJ, Cole M, Errington J, et al.: Pharmacokinetics of dactinomycin in a pediatric patient population: a United Kingdom Children's Cancer Study Group Study. *Clinical cancer research : an official journal of the American Association for Cancer Research* 11: 5893-5899, 2005.
53. Volpe A, Racioppi M, D'Agostino D, Cappa E, Filianoti A and Bassi PF: Mitomycin C for the treatment of bladder cancer. *Minerva urologica e nefrologica = The Italian journal of urology and nephrology* 62: 133-144, 2010.
54. Guadagni S, Fiorentini G, Clementi M, Palumbo P, Mambrini A and Masedu F: Mitomycin C hypoxic pelvic perfusion for unresectable recurrent rectal cancer: pharmacokinetic comparison of surgical and percutaneous techniques. *Updates in surgery* 69: 403-410, 2017.
55. Fox EJ: Mechanism of action of mitoxantrone. *Neurology* 63: S15-18, 2004.
56. Bailly C: Irinotecan: 25 years of cancer treatment. *Pharmacological research* 148: 104398, 2019.
57. Lihua P, Chen XY and Wu TX: Topotecan for ovarian cancer. *The Cochrane database of systematic reviews* 2008: Cd005589, 2008.
58. Nicum SJ and O'Brien ME: Topotecan for the treatment of small-cell lung cancer. *Expert review of anticancer therapy* 7: 795-801, 2007.
59. Baldwin EL and Osheroff N: Etoposide, topoisomerase II and cancer. *Current medicinal chemistry. Anti-cancer agents* 5: 363-372, 2005.
60. Sonneveld P: Teniposide in lymphomas and leukemias. *Seminars in oncology* 19: 59-64, 1992.
61. Di Nunno V, Mollica V and Massari F: Cabazitaxel in Metastatic Prostate Cancer. *The New England journal of medicine* 382: 1286, 2020.
62. Varnai R, Koskinen LM, Mäntylä LE, Szabo I, FitzGerald LM and Sipeky C: Pharmacogenomic Biomarkers in Docetaxel Treatment of Prostate Cancer: From Discovery to Implementation. *Genes* 10:2019.
63. Weaver BA: How Taxol/paclitaxel kills cancer cells. *Molecular biology of the cell* 25: 2677-2681, 2014.

64. Yardley DA: nab-Paclitaxel mechanisms of action and delivery. *Journal of controlled release : official journal of the Controlled Release Society* 170: 365-372, 2013.
65. Chong CD, Logothetis CJ, Savaraj N, Fritsche HA, Gietner AM and Samuels ML: The correlation of vinblastine pharmacokinetics to toxicity in testicular cancer patients. *Journal of clinical pharmacology* 28: 714-718, 1988.
66. Moore AS, Norris R, Price G, et al.: Vincristine pharmacodynamics and pharmacogenetics in children with cancer: a limited-sampling, population modelling approach. *Journal of paediatrics and child health* 47: 875-882, 2011.
67. Capasso A: Vinorelbine in cancer therapy. *Current drug targets* 13: 1065-1071, 2012.
68. Frey BM and Frey FJ: Clinical pharmacokinetics of prednisone and prednisolone. *Clinical pharmacokinetics* 19: 126-146, 1990.
69. Bruera E, Roca E, Cedaro L, Carraro S and Chacon R: Action of oral methylprednisolone in terminal cancer patients: a prospective randomized double-blind study. *Cancer treatment reports* 69: 751-754, 1985.
70. Burki TK: Selinexor and dexamethasone in multiple myeloma. *The Lancet. Oncology* 19: e146, 2018.
71. Bertoli S, Picard M, Bérard E, et al.: Dexamethasone in hyperleukocytic acute myeloid leukemia. *Haematologica* 103: 988-998, 2018.
72. Kantoff PW, Halabi S, Conaway M, et al.: Hydrocortisone with or without mitoxantrone in men with hormone-refractory prostate cancer: results of the cancer and leukemia group B 9182 study. *Journal of clinical oncology : official journal of the American Society of Clinical Oncology* 17: 2506-2513, 1999.
73. Nazer L, AlNajjar T, Al-Shaer M, Rimawi D and Hawari F: Evaluating the effectiveness and safety of hydrocortisone therapy in cancer patients with septic shock. *Journal of oncology pharmacy practice : official publication of the International Society of Oncology Pharmacy Practitioners* 21: 274-279, 2015.
74. Siddikuzzaman, Guruvayoorappan C and Berlin Grace VM: All trans retinoic acid and cancer. *Immunopharmacology and immunotoxicology* 33: 241-249, 2011.

75. Hoonjan M, Jadhav V and Bhatt P: Arsenic trioxide: insights into its evolution to an anticancer agent. *Journal of biological inorganic chemistry : JBIC : a publication of the Society of Biological Inorganic Chemistry* 23: 313-329, 2018.
76. Asselin B and Rizzari C: Asparaginase pharmacokinetics and implications of therapeutic drug monitoring. *Leukemia & lymphoma* 56: 2273-2280, 2015.
77. Swami U, Shah U and Goel S: Eribulin in Cancer Treatment. *Marine drugs* 13: 5016-5058, 2015.
78. De Luca A, D'Alessio A, Maiello MR, et al.: Evaluation of the pharmacokinetics of ixabepilone for the treatment of breast cancer. *Expert opinion on drug metabolism & toxicology* 11: 1177-1185, 2015.
79. Waszut U, Szyszka P and Dworakowska D: Understanding mitotane mode of action. *Journal of physiology and pharmacology : an official journal of the Polish Physiological Society* 68: 13-26, 2017.
80. Winer ES and DeAngelo DJ: A Review of Omacetaxine: A Chronic Myeloid Leukemia Treatment Resurrected. *Oncology and therapy* 6: 9-20, 2018.
81. Heo YA, Syed YY and Keam SJ: Pegaspargase: A Review in Acute Lymphoblastic Leukaemia. *Drugs* 79: 767-777, 2019.
82. Goerne R, Bogdahn U and Hau P: Procarbazine--a traditional drug in the treatment of malignant gliomas. *Current medicinal chemistry* 15: 1376-1387, 2008.
83. Smolewski P and Robak T: The discovery and development of romidepsin for the treatment of T-cell lymphoma. *Expert opinion on drug discovery* 12: 859-873, 2017.
84. Richon VM: Targeting histone deacetylases: development of vorinostat for the treatment of cancer. *Epigenomics* 2: 457-465, 2010.
